# Supplementary material
Source: PubMed Central journal article supplement (PMC4301405)
Supplement: NIHMS628948-supplement-supplement_1.pdf [file NIHMS628948-supplement-supplement_1.pdf]

**Supplementary Table 1: The association between HIV disease markers and time to RLE resolution<sup>†</sup>.**

| Analysis set | Parameter                             | Unadjusted Results    |         |   | Adjusted Results <sup>1,2</sup> |         |   |
|--------------|---------------------------------------|-----------------------|---------|---|---------------------------------|---------|---|
|              |                                       | Hazard Ratio (95% CI) | P-value | * | Hazard Ratio (95% CI)           | P-Value | * |
| RNA only     | HIV RNA copies (Log10) at RLE         | 0.74 (0.6,0.9)        | <.001   | * | 0.76 (0.6,0.9)                  | 0.002   | * |
|              | HIV RNA copies > 100,000 at RLE       | 0.29 (0.1,0.7)        | 0.004   | * | 0.31 (0.1,0.7)                  | 0.005   | * |
|              | HIV RNA copies (Log10)(time-varying)  | 0.84 (0.7,1.0)        | 0.03    | * | 0.85 (0.7,1.0)                  | 0.04    | * |
|              | HIV RNA, copies > 100K (time-varying) | 0.58 (0.3,1.0)        | 0.06    |   | 0.61 (0.3,1.1)                  | 0.10    |   |
| CD4 only     | CD4 pct at RLE                        | 1.02 (1.0,1.0)        | <.001   | * | 1.02 (1.0,1.0)                  | <.001   | * |
|              | CD4 pct < 25 at RLE                   | 0.63 (0.5,0.8)        | 0.002   | * | 0.66 (0.5,0.9)                  | 0.01    | * |
|              | CD4 pct (time-varying)                | 1.02 (1.0,1.0)        | 0.001   | * | 1.02 (1.0,1.0)                  | 0.003   | * |
|              | CD4 pct < 25 (time-varying)           | 0.62 (0.5,0.8)        | 0.002   | * | 0.64 (0.5,0.9)                  | 0.005   | * |

<sup>†</sup> These two sets of analyses were performed on derived datasets with RNA viral load and CD4 data, respectively

<sup>1</sup> Each row represents a separate time to event multivariate regression analysis. Results adjust for the final core models, which were developed with p < 0.20 to include and p < 0.15 to remain.

<sup>2</sup> The core model for each analysis included Black race and CDC stage C.
